# Supplementary material for: Efficacy and safety of an orally administered DGAT2 inhibitor alone or coadministered with a liver-targeted ACC inhibitor in adults with non-alcoholic steatohepatitis (NASH): rationale and design of the phase II, dose-ranging, dose-finding, randomised, placebo-controlled MIRNA (Metabolic Interventions to Resolve NASH with fibrosis) study
Source: HighWire-hosted journal article supplement (doi:10.1136/bmjopen-2021-056159), 2022-03-01
Supplement: bmjopen-2021-056159supp001_data_supplement.pdf [file bmjopen-2021-056159supp001_data_supplement.pdf]

**Efficacy and safety of an orally administered DGAT2 inhibitor alone or coadministered with a liver-targeted ACC inhibitor in adults with nonalcoholic steatohepatitis (NASH): rationale and design of the phase II, dose-ranging, dose-finding, randomised, placebo-controlled MIRNA (Metabolic Interventions to Resolve NASH with fibrosis) study**

Neeta B. Amin, Amanda Darekar, Quentin M. Anstee, Vincent Wai-Sun Wong, Frank Tacke, Manoli Vourvahis, Douglas S. Lee, Michael Charlton, Naim Alkhoury, Atsushi Nakajima, Carla Yunis

**SUPPLEMENTARY INFORMATION**

**Supplementary Table 1.** Collection of data during MIRNA

| Week                                    | Pre-qualification | Screen 1 | Screen 2 | Run-in | Baseline | Dosing week |   |   |   |   |    |    |    |    |    |    |    |    |    |    |    | Follow-up | Discontinuation |   |   |
|-----------------------------------------|-------------------|----------|----------|--------|----------|-------------|---|---|---|---|----|----|----|----|----|----|----|----|----|----|----|-----------|-----------------|---|---|
|                                         | -                 | -        | -        | -6     | -2       | 0           | 2 | 4 | 6 | 8 | 12 | 16 | 20 | 24 | 28 | 32 | 36 | 40 | 44 | 48 | 50 | 52        |                 |   |   |
| <b>Procedures</b>                       |                   |          |          |        |          |             |   |   |   |   |    |    |    |    |    |    |    |    |    |    |    |           |                 |   |   |
| Informed consent, demography            | ✓                 | ✓        |          |        |          |             |   |   |   |   |    |    |    |    |    |    |    |    |    |    |    |           |                 |   |   |
| Medical & medication history (update)   | ✓                 | ✓        |          | ✓      | ✓        | ✓           | ✓ | ✓ | ✓ | ✓ | ✓  | ✓  | ✓  | ✓  | ✓  | ✓  | ✓  | ✓  | ✓  | ✓  | ✓  | ✓         | ✓               | ✓ | ✓ |
| Ultrasound-guided liver biopsy          |                   |          | ✓        |        |          |             |   |   |   |   |    |    |    |    |    |    |    |    |    |    |    | ✓         |                 | ✓ |   |
| Liver fat and stiffness (FibroScan®)    | ✓                 | ✓        |          |        | ✓        |             |   |   | ✓ |   | ✓  |    |    | ✓  |    | ✓  |    | ✓  |    | ✓  |    |           |                 | ✓ |   |
| Liver MRI-PDFF (Imaging substudy)       |                   |          |          |        | ✓        |             |   |   | ✓ |   |    |    |    | ✓  |    |    |    |    |    |    | ✓  |           |                 | ✓ |   |
| Physical exam                           | ✓                 | ✓        |          |        | ✓        | ✓           | ✓ | ✓ | ✓ | ✓ | ✓  | ✓  |    | ✓  |    | ✓  |    | ✓  |    | ✓  | ✓  |           | ✓               | ✓ | ✓ |
| Alcohol intake assessed (AUDIT)         | ✓                 | ✓        |          |        |          | ✓           |   |   |   |   |    |    |    |    |    |    |    |    |    |    | ✓  |           |                 | ✓ |   |
| Counselling on diet/exercise guidelines |                   |          |          | ✓      | ✓        |             |   |   |   |   |    |    |    |    |    |    |    |    |    |    |    |           |                 |   |   |
| Adverse events (open-ended query)       | ✓                 | ✓        | ✓        | ✓      | ✓        | ✓           | ✓ | ✓ | ✓ | ✓ | ✓  | ✓  | ✓  | ✓  | ✓  | ✓  | ✓  | ✓  | ✓  | ✓  | ✓  | ✓         | ✓               | ✓ | ✓ |
| Single supine 12-lead ECG               | ✓                 | ✓        |          |        | ✓        | ✓           |   |   |   |   |    |    |    | ✓  |    |    |    |    |    |    | ✓  | ✓         |                 | ✓ |   |

| Week                                                                                                                                                                                 | Pre-qualification | Screen 1 | Screen 2 | Run-in | Baseline | Dosing week |   |   |   |   |    |    |    |    |    |    |    |    |    | Follow-up | Discontinuation |    |
|--------------------------------------------------------------------------------------------------------------------------------------------------------------------------------------|-------------------|----------|----------|--------|----------|-------------|---|---|---|---|----|----|----|----|----|----|----|----|----|-----------|-----------------|----|
|                                                                                                                                                                                      | -                 | -        | -        | -6     | -2       | 0           | 2 | 4 | 6 | 8 | 12 | 16 | 20 | 24 | 28 | 32 | 36 | 40 | 44 | 48        | 50              | 52 |
| Singled seated vitals (blood pressure, pulse rate) and body weight                                                                                                                   | ✓                 | ✓        |          |        | ✓        | ✓           | ✓ |   | ✓ |   | ✓  |    |    | ✓  |    | ✓  |    | ✓  |    | ✓         | ✓               | ✓  |
| Study intervention taken with morning meal                                                                                                                                           |                   |          |          |        | ✓        | ✓           | ✓ | ✓ | ✓ | ✓ | ✓  |    |    | ✓  | ✓  | ✓  | ✓  | ✓  | ✓  | ✓         |                 |    |
| <b>Blood collection (after overnight fast of ≥8 hours)</b>                                                                                                                           |                   |          |          |        |          |             |   |   |   |   |    |    |    |    |    |    |    |    |    |           |                 |    |
| FSH (females only), HBsAg, HCVAb, HIV, α1-antitrypsin, ceruloplasmin                                                                                                                 | ✓                 | ✓        |          |        |          |             |   |   |   |   |    |    |    |    |    |    |    |    |    |           |                 |    |
| % carbohydrate deficient transferrin                                                                                                                                                 | ✓                 | ✓        |          |        | ✓        | ✓           |   |   |   |   |    |    |    |    |    |    |    |    |    | ✓         |                 | ✓  |
| Haematology, chemistry, coagulation, triglycerides, direct LDL-C, HDL-C, total cholesterol, pregnancy (females only)                                                                 | ✓                 | ✓        |          |        | ✓        | ✓           | ✓ | ✓ | ✓ | ✓ | ✓  |    |    | ✓  |    | ✓  |    | ✓  |    | ✓         | ✓               | ✓  |
| HbA1c, plasma glucose                                                                                                                                                                | ✓                 | ✓        |          |        | ✓        | ✓           |   | ✓ |   | ✓ |    |    | ✓  |    | ✓  |    | ✓  |    | ✓  | ✓         |                 |    |
| Direct VLDL, ApoA1, ApoB <sub>total</sub> , ApoB100, ApoB48, ApoC3, ApoE, PCSK9, plasma insulin, adiponectin, CK18-M30, CK18-M65, ProC3, ProC6, enhanced liver fibrosis test, hs-CRP |                   |          |          |        | ✓        | ✓           |   | ✓ |   | ✓ |    |    | ✓  |    | ✓  |    | ✓  |    | ✓  | ✓         |                 |    |
| Pre-dose PK – DGAT2i and ACCi                                                                                                                                                        |                   |          |          |        |          | ✓           | ✓ |   |   | ✓ | ✓  | ✓  |    |    | ✓  |    |    |    |    | ✓         |                 |    |
| Post-dose PK – DGAT2i and ACCi                                                                                                                                                       |                   |          |          |        |          |             | ✓ |   |   | ✓ | ✓  | ✓  |    |    |    |    |    |    |    |           |                 |    |
| <b>Spot urine collection</b>                                                                                                                                                         |                   |          |          |        |          |             |   |   |   |   |    |    |    |    |    |    |    |    |    |           |                 |    |

| Week                                              | Pre-qualification | Dosing week |        |          |   |   |   |   |   |    |    |    |    |    |    |    |    |    |    |    | Follow-up | Discontinuation |   |   |
|---------------------------------------------------|-------------------|-------------|--------|----------|---|---|---|---|---|----|----|----|----|----|----|----|----|----|----|----|-----------|-----------------|---|---|
|                                                   | Screen 1          | Screen 2    | Run-in | Baseline | 0 | 2 | 4 | 6 | 8 | 12 | 16 | 20 | 24 | 28 | 32 | 36 | 40 | 44 | 48 | 50 | 52        |                 |   |   |
| Urine drug test                                   | ✓                 | ✓           |        | ✓        |   |   |   |   |   |    |    |    |    |    |    |    |    |    |    |    |           |                 |   |   |
| Urinalysis                                        | ✓                 | ✓           |        | ✓        | ✓ | ✓ | ✓ | ✓ | ✓ | ✓  | ✓  |    | ✓  |    | ✓  |    | ✓  |    | ✓  | ✓  | ✓         | ✓               | ✓ | ✓ |
| Pregnancy test (women of child-bearing potential) |                   |             |        | ✓        | ✓ | ✓ | ✓ | ✓ | ✓ | ✓  | ✓  |    | ✓  |    | ✓  |    | ✓  |    | ✓  | ✓  | ✓         | ✓               | ✓ | ✓ |

ACCi, acetyl-coenzyme A carboxylase inhibitor; Apo, apolipoprotein; AUDIT, Alcohol Use Disorders Identification Test; CK18-M30, cytokeratin-18-M30

fragment; CK18-M65, cytokeratin-18-M65 fragment; DGAT2i, diacylglycerol acyltransferase 2 inhibitor; ECG, electrocardiogram; FSH, follicle-stimulating

hormone; HbA1c, glycated haemoglobin; HBsAg, hepatitis B surface antigen; HCVAb, hepatitis C virus antibody; HDL-C, high density lipoprotein-cholesterol;

HIV, human immunodeficiency virus; hs-CRP, high-sensitivity C-reactive protein; LDL-C, low density lipoprotein-cholesterol; MIRNA, Metabolic Interventions

to Resolve NASH with Fibrosis; MRI-PDFF, magnetic resonance imaging-proton density fat fraction; NASH, nonalcoholic steatohepatitis; PCSK9, proprotein

convertase subtilisin/kexin type 9; PK, pharmacokinetics; ProC3, N-terminal propeptide of type III procollagen; ProC6, C-terminal fragment of  $\alpha$ 3 chain of

procollagen type VI; VLDL, very low density lipoprotein.

**Supplementary Table 2.** Inclusion and exclusion criteria in MIRNA

| Inclusion Criteria                                                                                                                                                                                                                                                                                                                                                                                                                                                                                                                                                                                                                                                                                                                                                                                                                                                                                                                                                                                                                                                                                                                                                                                                                                                                                                                                                                                                                                                                                                                                                                                                                                                                                                                                                                                                  |
|---------------------------------------------------------------------------------------------------------------------------------------------------------------------------------------------------------------------------------------------------------------------------------------------------------------------------------------------------------------------------------------------------------------------------------------------------------------------------------------------------------------------------------------------------------------------------------------------------------------------------------------------------------------------------------------------------------------------------------------------------------------------------------------------------------------------------------------------------------------------------------------------------------------------------------------------------------------------------------------------------------------------------------------------------------------------------------------------------------------------------------------------------------------------------------------------------------------------------------------------------------------------------------------------------------------------------------------------------------------------------------------------------------------------------------------------------------------------------------------------------------------------------------------------------------------------------------------------------------------------------------------------------------------------------------------------------------------------------------------------------------------------------------------------------------------------|
| <ul style="list-style-type: none"><li>• At pre-qualification and the first screening, participants must meet <math>\geq 2</math> of the following:<ul style="list-style-type: none"><li>○ Fasting plasma glucose <math>\geq 100</math> mg/dL (or taking agents to improve glycaemic control)</li><li>○ Fasting serum HDL-C <math>&lt; 40</math> mg/dL for males and <math>&lt; 50</math> mg/dL for females (or taking agents to increase HDL-C)</li><li>○ Fasting serum triglycerides <math>\geq 150</math> mg/dL (or taking agents to reduce triglycerides)</li><li>○ Seated blood pressure <math>\geq 130/85</math> mmHg (or taking agents for blood pressure control)</li><li>○ Waist circumference <math>\geq 40</math> inches for males and <math>\geq 35</math> inches for females</li></ul></li><li>• At both the pre-qualification and the first screening, FAST<sup>TM</sup> <math>\geq 0.30</math></li><li>• At the second screening, ultrasound-guided liver biopsy meeting the NASH-CRN definition<ul style="list-style-type: none"><li>○ Total NAS <math>\geq 4</math> with steatosis, inflammation, and ballooning grades all <math>\geq 1</math></li><li>○ Fibrosis scoring of F2 or F3</li></ul></li><li>• Participants are willing and able to comply with all scheduled visits, dosing plan, laboratory tests, lifestyle considerations, and other study procedures including a second biopsy while in the study</li><li>• At pre-qualification and first screening, BMI <math>\geq 25</math> kg/m<sup>2</sup> or <math>\geq 22.5</math> kg/m<sup>2</sup> (Asia only) and <math>\leq 40</math> kg/m<sup>2</sup></li><li>• Demonstration of stable body weight (within 5%) for <math>\geq 12</math> weeks before the first screening</li><li>• Capable of giving signed informed consent</li></ul> |
| Exclusion Criteria                                                                                                                                                                                                                                                                                                                                                                                                                                                                                                                                                                                                                                                                                                                                                                                                                                                                                                                                                                                                                                                                                                                                                                                                                                                                                                                                                                                                                                                                                                                                                                                                                                                                                                                                                                                                  |
| <ul style="list-style-type: none"><li>• At pre-qualification and first screening visit, current significant alcohol consumption defined by any of the following:<ul style="list-style-type: none"><li>○ <math>&gt; 14</math> or <math>&gt; 7</math> drinks/week for males or females, respectively</li><li>○ % carbohydrate deficient transferrin <math>\geq 1.5 \times</math> ULN</li><li>○ Total score of <math>\geq 8</math> on the interview-based AUDIT questionnaire<sup>1</sup></li></ul></li><li>• At pre-qualification and first screening, evidence of other causes of liver disease, including:<ul style="list-style-type: none"><li>○ Alcoholic steatohepatitis, compensated and decompensated cirrhosis, histological presence of cirrhosis on screening/baseline liver biopsy, HIV infection, hepatocellular carcinoma or other types of liver cancer</li><li>○ Active viral hepatitis B, defined by presence of HBsAg</li><li>○ Active viral hepatitis C, defined as presence of HCVAb<ul style="list-style-type: none"><li>▪ Those cured are eligible so long as there is evidence of SVR for <math>\geq 3</math> years</li></ul></li><li>○ Wilson's disease, defined as ceruloplasmin level <math>&lt; 0.1</math> g/L</li><li>○ A1AT deficiency, defined as A1AT level <math>&lt; LLN</math></li><li>○ Upper gastrointestinal bleed due to oesophageal varices, liver transplant, or current MELD-Na score <math>&gt; 12</math></li></ul></li><li>• At pre-qualification, history of pancreatitis</li><li>• At pre-qualification, any condition possibly affecting absorption (eg. prior bariatric surgery, gastrectomy, ileal resection)</li></ul>                                                                                                                                                |

- Within 12 weeks prior to first screening, diagnosis of type 2 diabetes mellitus which requires management with >3 medications
- Within 12 weeks prior to first screening, dyslipidaemia which requires management with >3 lipid-modifying agents
- Severe hypertension ( $\geq 180$  mmHg systolic and  $\geq 105$  mmHg diastolic) at pre-qualification and first screening, or management with >3 agents to control blood pressure within 12 weeks prior to first screening
- A cardiovascular event within 12 months prior to pre-qualification
- Recent (within 5 years of pre-qualification) systemically administered treatments for malignancy
- Known participation in a trial involving DGAT2i or ACCi, or previous administration with an investigational product,  $\leq 30$  days or 5 half-lives preceding the first dose of investigational product
- Any of the following diagnostic measurements, at both pre-qualification and first screening:
  - ALT  $< 0.5$ x ULN or  $> 5$ x ULN
  - AST  $> 5$ x ULN
  - ALP  $> 2$ x ULN
  - Total bilirubin  $> \text{ULN}$  and direct bilirubin  $> \text{ULN}$
  - HbA1c  $> 9\%$
  - Fasting plasma glucose  $> 270$  mg/dL
  - Fasting serum triglycerides  $> 400$  mg/dL
  - Platelet count  $< \text{LLN}$
  - INR  $\geq 1.3$
  - Albumin  $< \text{LLN}$
  - eGFR of  $< 30$  mL/min/1.73 m<sup>2</sup>, using Cystatin-C and CKD-EPI equation
  - Positive urine test for illicit drugs
- Supine ECG QTc interval  $> 480$  msec or QRS interval  $> 120$  msec at pre-qualification and first screening
- Participants meeting criteria for contraindication to undergoing imaging assessments
- Investigator site staff or Pfizer employee directly involved in the conduct of the study, site staff otherwise supervised by the investigator, and their respective family members

---

A1AT, alpha-1-antitrypsin; ACCi, acetyl-coenzyme A carboxylase inhibitor; ALP, alkaline phosphatase;

ALT, alanine aminotransferase; AST, aspartate aminotransferase; AUDIT, alcohol use disorders

identification test; BMI, body mass index; CAP<sup>TM</sup>, controlled attenuation parameter; CRN, clinical

research network; DGAT2i; diacylglycerol acyltransferase 2 inhibitor; ECG, electrocardiogram; eGFR,

enhanced glomerular filtration rate; FAST<sup>TM</sup>, a derived score (using CAP<sup>TM</sup>, VCTE<sup>TM</sup>, and AST) to

identify those with progressive NASH; HbA1C, glycated haemoglobin; HBsAg, hepatitis B surface

antigen; HCVAb, hepatitis C virus antibody; HIV, human immunodeficiency virus; HDL-C, high density

lipoprotein-cholesterol; INR, international normalised ratio; LLN, lower limit of normal; MELD-Na,

model of end-stage liver disease including serum sodium, serum creatinine, total bilirubin and INR; NAFLD, nonalcoholic fatty liver disease; NAS, NAFLD Activity Score; NASH, nonalcoholic steatohepatitis; SVR, sustained virology response; ULN, upper limit of normal; VCTE™, vibration-controlled transient elastography.

**Supplementary Table 3. Concomitant medications in MIRNA****Medication for glycaemic control**

- Participants are permitted to be on stable doses of  $\leq 3$  agents for glycaemic control, for  $\geq 12$  weeks prior to first screening and until first on-site follow-up, across the country-specific approved classes of agents for glycaemic control. For example:
  - Biguanides
  - Dipeptidyl peptidase-IV inhibitors
  - Sodium-glucose cotransporter 2 inhibitors
  - Sulphonylureas
  - $\alpha$ -glucosidase inhibitors
  - Meglitinide analogues
- Those on thiazolidinediones/peroxisome proliferator-activated receptor gamma (e.g. pioglitazone) must be on a stable dose for  $\geq 24$  weeks before first screening
- Those on metformin at doses  $> 1$  g/day must decrease the dose by one-third or one-half starting at the run-in visit.<sup>a</sup>
  - Upward adjustment is permitted post-randomisation based on fasting plasma glucose
- Those on insulin must be on stable doses for  $\geq 12$  weeks before first screening
  - Short-term use of sliding scale insulin to manage glycaemic control during a concomitant acute medical condition is acceptable
- Those on glucagon-like peptide-1 receptor agonists must be on stable doses for  $\geq 12$  weeks before first screening

**Lipid-modifying medications**

- Participants are permitted to be on stable doses of  $\leq 3$  lipid-modifying oral agents, for  $\geq 12$  weeks prior to first screening and until the first on-site follow-up/week 50, across the country-specific, approved classes of agents including the following:
  - Those on selected statins which are BCRP substrates will only be permitted if on:
    - Rosuvastatin doses up to 10 mg/day
    - Atorvastatin doses up to 40 mg/day
    - Simvastatin or fluvastatin doses up to half-maximum in-country approved dose
  - Bile acid sequestrants such as cholestyramine, colestipol, as well as colesevalam
  - Fibric acid derivatives such as fenofibrate, bezafibrate, pemfibrate
  - Nicotinic acid/niacin
  - Ezetimibe
  - Participants on gemfibrozil at first screening are to be switched to another acceptable agent starting at the Run-In visit, with stable dose of the acceptable agent achieved for  $\geq 6$  weeks before day 1.

**Medications for controlling blood pressure**

- Participants are permitted to be on stable doses of  $\leq 3$  agents for blood pressure control, for  $\geq 12$  weeks prior to first screening and until the first on-site follow-up

**Other acceptable concomitant medications**

- Multi-vitamins are permitted, but vitamin E doses must be stable for  $\geq 24$  weeks before first screening



- Aspirin  $\leq$ 325 mg/day
- Oral agents that alter gastric pH
- Inhaled and topical corticosteroids
  - Intercurrent treatment with systemic steroids may be permitted if treatment does not exceed 14 days
- Thyroid replacement therapy
- Postmenopausal hormone therapy
- Antipsychotic medications such as tricyclic agents, selective serotonin reuptake inhibitors, and serotonin/norepinephrine reuptake inhibitors
- Select supplements (herbal or approved agents) as a part of standard care to lower liver function markers: glutathione, glycyrrhizic acid, polyene phosphatidylcholine, silymarin, ursodeoxycholic acid
- Chronic and intermittent use of nonsteroidal anti-inflammatory drugs
- Intermittent use of acetaminophen/paracetamol at doses up to 2 g/day is acceptable.

#### Prohibited medications

- Use of drugs historically associated with fatty liver, taken within any interval lasting  $\geq$ 4 weeks in the previous 12-months prior to first screening:
  - Amiodarone, methotrexate, systemic glucocorticoids (such as prednisone, dexamethasone, triamcinolone, budesonide, betamethasone), anabolic steroids, tetracyclines, tamoxifen, oestrogens at doses greater than those used for hormone replacement, valproic acid, other known hepatotoxins
- Use of the following medications  $\leq$  12 weeks prior to first screening, or likely to need these medications based on medical history at any time until first on-site follow-up:
  - Chronic use of immunosuppressants (e.g. cyclosporine and tacrolimus)
  - Agents with approved indication for weight loss (e.g. orlistat and sibutramin)
  - Over-the-counter appetite-stimulants or appetite-suppressants
- P-gp substrates with narrow therapeutic index (e.g. digoxin)
- Potent inducers and inhibitors CYP-3A
- CYP-2C9 substrates with narrow therapeutic index (e.g. warfarin or phenytoin)
- Blood thinners (e.g. apixaban, dabigatran, rivaroxaban, edoxaban, fondaparinux, heparin, and vitamin K antagonists [such as warfarin])
- Clinically significant OATP inhibitors (e.g. cyclosporine, gemfibrozil, rifampin)

<sup>a</sup>DGAT2i 300 mg BID was shown to increase metformin exposures approximately 2-fold (data on file).

BCRP, breast cancer resistant protein; BID, twice-daily; CYP, cytochrome P-450; DGAT2i,

diacylglycerol acyltransferase 2 inhibitor; OATP, organic anion-transporting polypeptide; P-gp, P-glycoprotein.

**Supplementary Table 4.** Clinical laboratory tests performed in MIRNA

| Haematology                                                                                                                                                                                                                                                                                                                                                                                                                                                                                                                              | Chemistry                                                                                                                                                                                                                                                                                                                                                                                                                                                                                                                                                                                                                                                  | Urinalysis                                                                                                                                                                                                                                                              | Other                                                                                                                                                                                                                                                                                                                                                                                                                                                                                                                                                                                                                                                                                                                                                                                                                                                                                                                            |
|------------------------------------------------------------------------------------------------------------------------------------------------------------------------------------------------------------------------------------------------------------------------------------------------------------------------------------------------------------------------------------------------------------------------------------------------------------------------------------------------------------------------------------------|------------------------------------------------------------------------------------------------------------------------------------------------------------------------------------------------------------------------------------------------------------------------------------------------------------------------------------------------------------------------------------------------------------------------------------------------------------------------------------------------------------------------------------------------------------------------------------------------------------------------------------------------------------|-------------------------------------------------------------------------------------------------------------------------------------------------------------------------------------------------------------------------------------------------------------------------|----------------------------------------------------------------------------------------------------------------------------------------------------------------------------------------------------------------------------------------------------------------------------------------------------------------------------------------------------------------------------------------------------------------------------------------------------------------------------------------------------------------------------------------------------------------------------------------------------------------------------------------------------------------------------------------------------------------------------------------------------------------------------------------------------------------------------------------------------------------------------------------------------------------------------------|
| <ul style="list-style-type: none"> <li>• Haemoglobin</li> <li>• Haematocrit</li> <li>• Red blood cell count</li> <li>• Reticulocyte count (absolute)</li> <li>• Mean corpuscular volume</li> <li>• Mean corpuscular haemoglobin</li> <li>• Mean corpuscular haemoglobin concentration</li> <li>• Platelet count</li> <li>• White blood cell count</li> <li>• Total neutrophils (absolute)</li> <li>• Eosinophils (absolute)</li> <li>• Monocytes (absolute)</li> <li>• Basophils (absolute)</li> <li>• Lymphocytes (absolute)</li> </ul> | <ul style="list-style-type: none"> <li>• Blood urea nitrogen</li> <li>• Creatinine</li> <li>• Plasma glucose</li> <li>• Calcium</li> <li>• Sodium</li> <li>• Potassium</li> <li>• Chloride</li> <li>• Total carbon dioxide (bicarbonate)</li> <li>• Aspartate aminotransferase</li> <li>• Alanine aminotransferase</li> <li>• Alkaline phosphatase</li> <li>• <math>\gamma</math>-glutamyl transferase</li> <li>• Total bilirubin</li> <li>• Direct (conjugated) bilirubin</li> <li>• Indirect (unconjugated) bilirubin</li> <li>• Total bile acids</li> <li>• Creatine kinase</li> <li>• Uric acid</li> <li>• Albumin</li> <li>• Total protein</li> </ul> | <ul style="list-style-type: none"> <li>• pH</li> <li>• Glucose</li> <li>• Protein</li> <li>• Blood</li> <li>• Ketones</li> <li>• Nitrites</li> <li>• Leukocyte esterase</li> <li>• Urobilinogen</li> <li>• Urine bilirubin</li> <li>• Microscopy<sup>a</sup></li> </ul> | <ul style="list-style-type: none"> <li>• Cystatin-C (and enhanced glomerular filtration rate using Chronic Kidney Disease-Epidemiology Collaboration equation-Cystatin-C)</li> <li>• Plasma activated partial thromboplastin time, prothrombin time, and international normalised ratio</li> <li>• Serum follicle-stimulating hormone<sup>b</sup></li> <li>• Serum and urine pregnancy test</li> <li>• Urine drug test<sup>c</sup></li> <li>• <math>\alpha</math>1-antitrypsin<sup>d</sup></li> <li>• Ceruloplasmin<sup>d</sup></li> <li>• Serology:<sup>d</sup> hepatitis B surface antigen, hepatitis C virus antibody (and if positive, reflex hepatitis C virus ribonucleic acid), human immunodeficiency virus</li> <li>• % carbohydrate deficient transferrin relative to total transferrin<sup>e</sup></li> <li>• Glycated haemoglobin</li> <li>• Fasting serum lipid panel<sup>f</sup></li> <li>• Adiponectin</li> </ul> |
| <b>Additional exploratory biomarker assessments<sup>g</sup> include:</b>                                                                                                                                                                                                                                                                                                                                                                                                                                                                 |                                                                                                                                                                                                                                                                                                                                                                                                                                                                                                                                                                                                                                                            |                                                                                                                                                                                                                                                                         |                                                                                                                                                                                                                                                                                                                                                                                                                                                                                                                                                                                                                                                                                                                                                                                                                                                                                                                                  |

- 
- Serum apolipoprotein A1, B (total), B100, B48, C3, E and direct very low density lipoprotein
  - Plasma insulin
  - High-sensitivity C-reactive protein
  - Cytokeratin-18-M30 fragment; cytokeratin-18-M65 fragment
  - N-terminal propeptide of type III procollagen
  - C-terminal fragment of  $\alpha 3$  chain of procollagen type VI
  - Plasma proprotein convertase subtilisin/kexin type 9
  - Enhanced liver fibrosis test

---

<sup>a</sup>Only if urine dipstick is positive for blood, protein, nitrites, or leukocyte esterase

<sup>b</sup>In females, at pre-qualification, and first screening, only

<sup>c</sup>At pre-qualification, first screening, and baseline only; minimum requirement for urine drug test include cocaine, opiates/opioids, benzodiazepines, and amphetamines; this test not permitted to be repeated at scheduled visits.

<sup>d</sup>At pre-qualification and first screening only

<sup>e</sup>At pre-qualification, first screening, baseline, day 1, week 48, and when study intervention is prematurely stopped (with participant remaining in study or permanently withdrawn)

<sup>f</sup>Includes triglycerides, high density lipoprotein-cholesterol, direct low density lipoprotein-cholesterol, and total cholesterol

<sup>g</sup>At selected visits starting from baseline to first on-site follow-up

**Supplementary Table 5.** Summary of the probability of meeting decision criteria for drug/dose comparisons, in order to establish sample size

| Arm                | Dose group  | Comparator            | $\Delta$   | Analysis method              | Criteria                                                                                                             | Probability of meeting criteria                            | N evaluable per group |
|--------------------|-------------|-----------------------|------------|------------------------------|----------------------------------------------------------------------------------------------------------------------|------------------------------------------------------------|-----------------------|
| Placebo            | Placebo     | –                     | –          | –                            | –                                                                                                                    |                                                            | 40                    |
| DGAT2i             | 25 mg BID   | Placebo               | 24%        | $E_{\max}$ DR modelling      | $\geq 95\%$ certainty of $\geq 0\%$ $\Delta$ vs placebo and $\geq 67\%$ certainty of $\geq 24\%$ $\Delta$ vs placebo | 0.004 <sup>a</sup>                                         | 40                    |
|                    | 75 mg BID   | Placebo               | 24%        | $E_{\max}$ DR modelling      | $\geq 95\%$ certainty of $\geq 0\%$ $\Delta$ vs placebo and $\geq 67\%$ certainty of $\geq 24\%$ $\Delta$ vs placebo | 0.626 <sup>a</sup>                                         | 40                    |
|                    | 150 mg BID  | Placebo               | 24%        | $E_{\max}$ DR modelling      | $\geq 95\%$ certainty of $\geq 0\%$ $\Delta$ vs placebo and $\geq 67\%$ certainty of $\geq 24\%$ $\Delta$ vs placebo | 0.892 <sup>a</sup>                                         | 40                    |
|                    | 300 mg BID  | Placebo               | 24%        | $E_{\max}$ DR modelling      | $\geq 95\%$ certainty of $\geq 0\%$ $\Delta$ vs placebo and $\geq 67\%$ certainty of $\geq 24\%$ $\Delta$ vs placebo | 0.945 <sup>a</sup>                                         | 40                    |
|                    | 150 mg QD   | Placebo               | 24%        | Pairwise/ER modelling        | Power for 24% $\Delta$ vs placebo                                                                                    | 0.75 (power)                                               | 40                    |
|                    | 300 mg QD   | Placebo               | 24%        | Pairwise/ER modelling        | Power for 24% $\Delta$ vs placebo                                                                                    | 0.75 (power)                                               | 40                    |
|                    | DGAT2i+ACCI | 150 mg BID + 5 mg BID | 150 mg BID | (3%)                         | Pairwise/linear DR modelling                                                                                         | $\geq 75\%$ certainty of $\geq 0\%$ $\Delta$ vs 150 mg BID | 0.67                  |
| 300 mg + 10 mg BID |             | 300 mg BID            | (6%)       | Pairwise/linear DR modelling | $\geq 75\%$ certainty of $\geq 0\%$ $\Delta$ vs 300 mg BID                                                           | 0.82                                                       | 40                    |

<sup>a</sup>Assuming an  $E_{\max} = 0.6$ .

DR, dose response;  $E_{\max}$ , maximum effect of drug; ER, exposure–response.

## References

1. Saunders JB, Aasland OG, Babor TF, *et al.* Development of the alcohol use disorders identification test (AUDIT): WHO collaborative project on early detection of persons with harmful alcohol consumption-II. *Addiction* 1993;88:791–804.
